# Supplementary material for: Azithromycin ameliorated cigarette smoke-induced airway epithelial barrier dysfunction by activating Nrf2/GCL/GSH signaling pathway
Source: Springer Nature journal article supplement (doi:10.1186/s12931-023-02375-9), 2023-03-06
Supplement: MOESM1 [file 24442700]

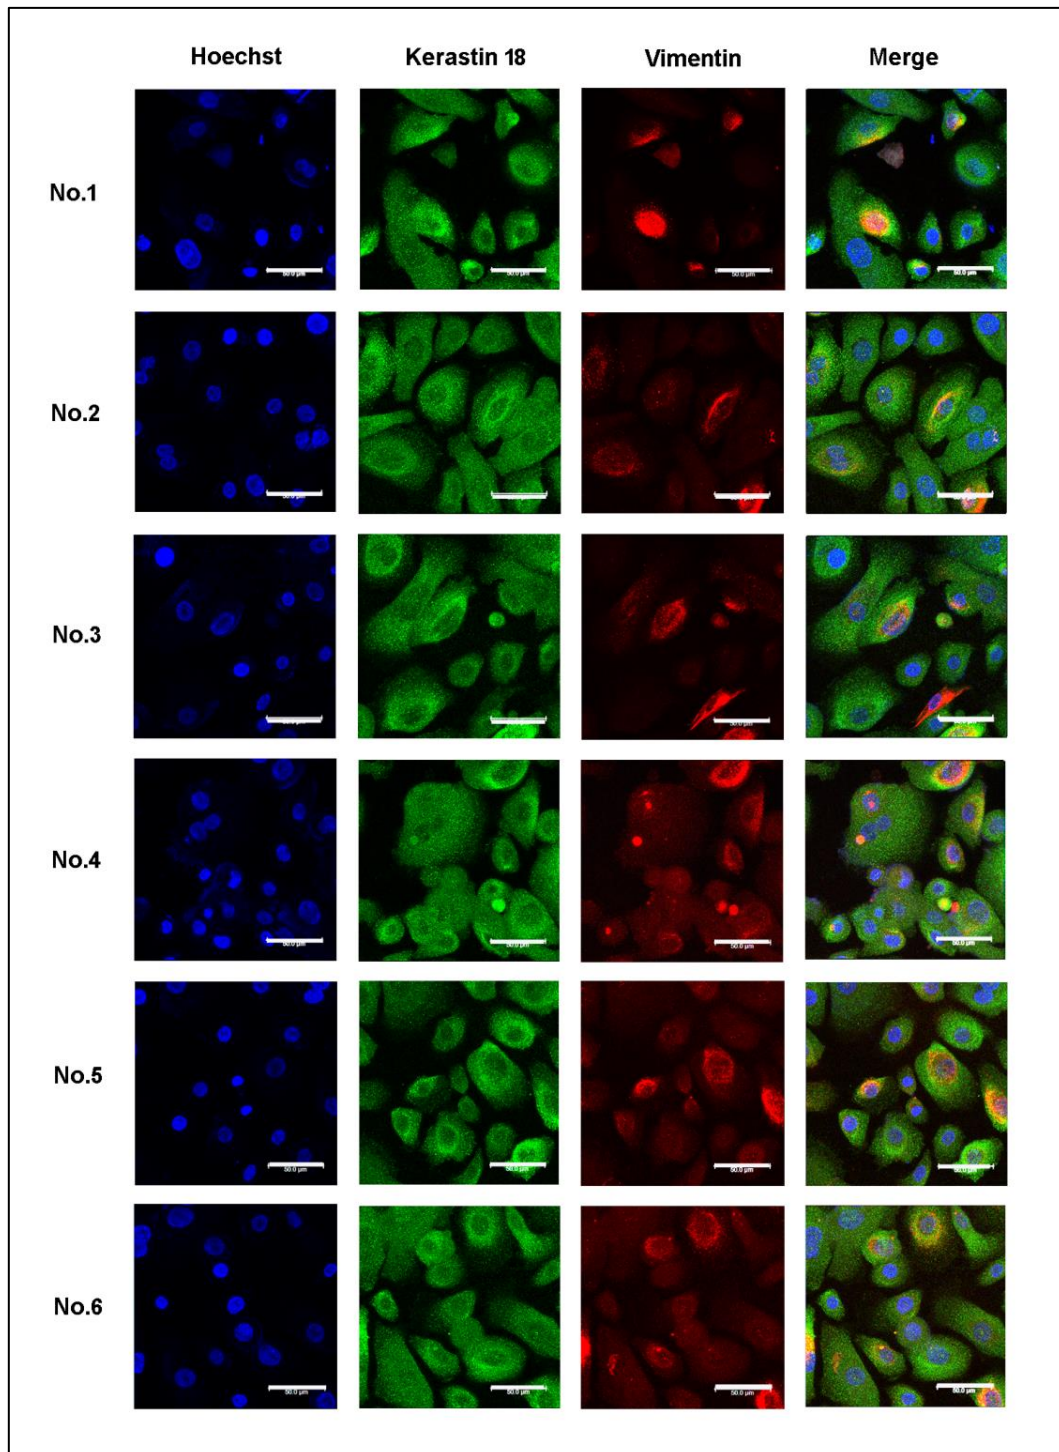

**Fig S1. Identification of primary bronchial epithelial cells (PBECs).** Immunofluorescence staining was performed to identify PBECs from healthy subjects (n=6). The scale bar represents 50  $\mu$ m. anti-Keratin18 (#4548T) and anti-Vimentin (#5741T) primary antibodies, along with Alexa Fluor 594/488 conjugated anti-rabbit (#8889S)/mouse (#4408S) IgG (H+L) F(ab')<sub>2</sub> Fragments

were purchased from Cell Signaling Technology (Danvers, MA, USA). The dilution ratio of primary antibodies (Keratin18 and Vimentin) was 1:100. Hoechst (#C1027) was purchased from Beyotime Biotechnology (Shanghai, China).
